# Supplementary material for: The Tissue Distribution and Urinary Excretion Study of Gallic Acid and Protocatechuic Acid after Oral Administration of Polygonum Capitatum Extract in Rats
Source: PubMed Central journal article supplement (PMC6273519; doi:10.3390/molecules21040399), 2016-03-24
Supplement: molecules-21-00399-s001.pdf [file molecules-21-00399-s001.pdf]

## Supplementary Materials: The Tissue Distribution and Urinary Excretion Study of Gallic Acid and Protocatechuic Acid after Oral Administration of *Polygonum Capitatum* Extract In Rats

Feng-Wei Ma, Qing-Fang, Xin Zhou, Xiao-Jian Gong, Yang Zhao, Hua-Guo Chen and Chao Zhao

**Table S1.** Summary of accuracy, precision, and extract recovery of GA and PCA in rat kidney and urine ( $n = 6$ ).

| Tissue | Analyte | Nominal Concentration (ng/mL) | Intra-day                      |                   |                               | Inter-day                      |                   |                               | Extract Recovery (%) |
|--------|---------|-------------------------------|--------------------------------|-------------------|-------------------------------|--------------------------------|-------------------|-------------------------------|----------------------|
|        |         |                               | Measured Concentration (ng/mL) | Precision (% RSD) | Accuracy (% RE <sup>a</sup> ) | Measured Concentration (ng/mL) | Precision (% RSD) | Accuracy (% RE <sup>a</sup> ) |                      |
| Kidney | GA      | 30                            | 32.43                          | 16.31             | 8.10                          | 33.14                          | 10.53             | 10.47                         | 81.51 ± 5.16         |
|        |         | 300                           | 345.34                         | 6.53              | 15.11                         | 307.36                         | 6.24              | 2.45                          | 80.26 ± 4.87         |
|        |         | 3000                          | 3112.67                        | 5.68              | 3.76                          | 2808.94                        | 3.89              | -6.37                         | 84.94 ± 6.29         |
|        | PCA     | 10                            | 9.45                           | 14.77             | -5.50                         | 9.53                           | 10.35             | -4.70                         | 81.47 ± 5.19         |
|        |         | 100                           | 111.56                         | 6.42              | 11.56                         | 106.34                         | 6.98              | 6.34                          | 81.96 ± 7.46         |
|        |         | 1000                          | 889.21                         | 4.98              | -11.08                        | 888.34                         | 8.93              | -11.17                        | 86.45 ± 6.51         |
| Lung   | GA      | 30                            | 31.94                          | 13.79             | 6.47                          | 27.87                          | 14.22             | -7.10                         | 82.02 ± 5.27         |
|        |         | 300                           | 289.11                         | 4.69              | -3.63                         | 307.63                         | 8.76              | 2.54                          | 82.44 ± 4.96         |
|        |         | 3000                          | 2788.56                        | 9.71              | -7.05                         | 3117.82                        | 4.98              | 3.93                          | 84.21 ± 7.30         |
|        | PCA     | 10                            | 11.37                          | 14.21             | 13.70                         | 10.15                          | 11.34             | 1.50                          | 86.37 ± 6.91         |
|        |         | 100                           | 89.74                          | 8.85              | -0.26                         | 88.58                          | 5.73              | -1.42                         | 86.56 ± 8.64         |
|        |         | 1000                          | 1137.16                        | 5.98              | 13.72                         | 897.16                         | 7.52              | -0.28                         | 90.87 ± 7.63         |
| Heart  | GA      | 30                            | 26.67                          | 9.81              | -11.10                        | 31.09                          | 10.43             | 3.63                          | 81.06 ± 6.15         |
|        |         | 300                           | 277.75                         | 7.94              | -7.42                         | 311.32                         | 7.99              | 3.77                          | 80.68 ± 7.84         |
|        |         | 3000                          | 2805.48                        | 9.28              | -6.48                         | 2904.89                        | 8.98              | -3.17                         | 84.99 ± 9.26         |
|        | PCA     | 10                            | 9.17                           | 10.34             | -8.30                         | 8.67                           | 12.09             | -3.30                         | 86.42 ± 9.34         |
|        |         | 100                           | 104.22                         | 9.70              | 4.22                          | 87.34                          | 9.32              | -2.66                         | 82.46 ± 7.59         |
|        |         | 1000                          | 958.09                         | 9.43              | -4.19                         | 1122.36                        | 8.63              | 12.24                         | 86.93 ± 6.63         |
| Liver  | GA      | 30                            | 30.96                          | 13.47             | 3.20                          | 30.37                          | 10.23             | 1.23                          | 85.49 ± 6.27         |
|        |         | 300                           | 307.35                         | 9.55              | 2.45                          | 299.05                         | 9.78              | -0.32                         | 84.48 ± 5.97         |
|        |         | 3000                          | 3227.71                        | 10.63             | 7.59                          | 2943.88                        | 8.13              | -1.87                         | 80.67 ± 7.31         |
|        | PCA     | 10                            | 8.92                           | 11.22             | -0.80                         | 8.71                           | 14.10             | -1.29                         | 82.93 ± 6.91         |
|        |         | 100                           | 90.81                          | 7.89              | -9.19                         | 101.38                         | 10.12             | 1.38                          | 81.50 ± 8.57         |
|        |         | 1000                          | 1068.5                         | 8.45              | 6.85                          | 1068.17                        | 8.11              | 6.82                          | 86.68 ± 7.62         |

Table S1. Cont.

|        |     |      |         |       |        |         |       |        |              |
|--------|-----|------|---------|-------|--------|---------|-------|--------|--------------|
| Spleen | GA  | 30   | 27.35   | 11.32 | -8.83  | 31.43   | 7.74  | 4.77   | 81.14 ± 6.38 |
|        |     | 300  | 309.87  | 8.78  | 3.29   | 313.12  | 7.43  | 4.37   | 87.36 ± 9.65 |
|        |     | 3000 | 2852.75 | 9.58  | -4.91  | 3123.47 | 6.61  | 4.12   | 80.96 ± 8.42 |
|        | PCA | 10   | 10.26   | 9.98  | 2.60   | 10.38   | 10.21 | 3.80   | 83.75 ± 7.14 |
|        |     | 100  | 93.70   | 10.01 | -6.30  | 95.12   | 7.36  | -4.88  | 81.91 ± 6.73 |
|        |     | 1000 | 989.24  | 5.45  | -1.08  | 1066.98 | 6.12  | 6.70   | 86.93 ± 8.47 |
| Brain  | GA  | 30   | 29.08   | 9.33  | -3.07  | 28.49   | 7.49  | -5.03  | 85.56 ± 7.26 |
|        |     | 300  | 284.45  | 8.59  | -5.18  | 297.59  | 9.72  | -0.80  | 90.25 ± 8.85 |
|        |     | 3000 | 3124.53 | 8.66  | 4.16   | 3056.57 | 10.39 | 1.89   | 80.71 ± 9.74 |
|        | PCA | 10   | 9.57    | 12.09 | -4.30  | 9.48    | 9.97  | -5.20  | 91.72 ± 8.21 |
|        |     | 100  | 98.86   | 8.78  | -1.14  | 93.64   | 7.99  | -6.56  | 81.96 ± 5.79 |
|        |     | 1000 | 1006.50 | 8.23  | 0.65   | 1011.42 | 5.44  | 1.14   | 87.41 ± 6.54 |
| Urine  | GA  | 60   | 64.84   | 4.71  | 8.07   | 64.80   | 9.97  | 8.00   | 90.10 ± 3.75 |
|        |     | 300  | 278.01  | 10.90 | -7.33  | 284.43  | 5.26  | -5.19  | 86.49 ± 8.48 |
|        |     | 3000 | 2707.50 | 2.15  | -9.75  | 2740.56 | 4.32  | -8.65  | 86.84 ± 8.43 |
|        | PCA | 20   | 18.10   | 10.56 | -9.50  | 19.46   | 12.18 | -2.70  | 84.64 ± 5.08 |
|        |     | 100  | 96.09   | 7.07  | -3.91  | 96.09   | 3.65  | -3.91  | 90.43 ± 5.38 |
|        |     | 1000 | 892.25  | 1.69  | -10.78 | 885.49  | 1.48  | -11.45 | 90.86 ± 7.15 |

<sup>a</sup> RE is expressed as (measured concentration/nominal concentration) × 100%.

**Table S2.** Stability data of GA and PCA in rat tissues and urine under different conditions.

| Status | Analyte | Nominal Concentration (ng/mL) | Room Temperature Stability                 |              |         | Post-preparative Stability                 |              |         |
|--------|---------|-------------------------------|--------------------------------------------|--------------|---------|--------------------------------------------|--------------|---------|
|        |         |                               | Found Concentration (Mean $\pm$ SD; ng/mL) | Accuracy (%) | RSD (%) | Found Concentration (Mean $\pm$ SD; ng/mL) | Accuracy (%) | RSD (%) |
| Kidney | GA      | 1700                          | 1767.45 $\pm$ 430.91                       | 103.97       | 8.43    | 1568.35 $\pm$ 91.44                        | 92.26        | 9.54    |
|        | PCA     | 85                            | 84.51 $\pm$ 23.03                          | 99.42        | 3.62    | 81.98 $\pm$ 13.45                          | 96.45        | 6.34    |
| Lung   | GA      | 1700                          | 1553.68 $\pm$ 487.37                       | 91.39        | 11.41   | 1568.35 $\pm$ 379.42                       | 92.26        | 9.26    |
|        | PCA     | 85                            | 82.19 $\pm$ 39.42                          | 96.69        | 10.60   | 83.16 $\pm$ 26.13                          | 97.84        | 8.97    |
| Heart  | GA      | 1700                          | 1642.39 $\pm$ 134.16                       | 96.61        | 8.36    | 1624.27 $\pm$ 114.22                       | 95.55        | 6.69    |
|        | PCA     | 85                            | 87.73 $\pm$ 42.39                          | 103.21       | 8.36    | 83.87 $\pm$ 24.38                          | 98.67        | 10.21   |
| Liver  | GA      | 1700                          | 1652.30 $\pm$ 256.03                       | 97.19        | 5.41    | 1528.42 $\pm$ 258.34                       | 89.91        | 7.19    |
|        | PCA     | 85                            | 85.09 $\pm$ 9.09                           | 100.11       | 3.98    | 86.2 $\pm$ 42.28                           | 101.41       | 10.11   |
| Spleen | GA      | 1700                          | 1675.32 $\pm$ 346.67                       | 98.55        | 7.24    | 1545.75 $\pm$ 34.44                        | 90.93        | 8.55    |
|        | PCA     | 85                            | 84.11 $\pm$ 32.75                          | 98.95        | 8.16    | 80.33 $\pm$ 17.31                          | 94.51        | 9.33    |
| Brain  | GA      | 1700                          | 1680.08 $\pm$ 163.32                       | 98.33        | 6.83    | 1452.94 $\pm$ 169.45                       | 85.47        | 7.37    |
|        | PCA     | 85                            | 83.11 $\pm$ 22.37                          | 97.78        | 8.91    | 82.82 $\pm$ 10.33                          | 97.44        | 9.42    |
| Urine  | GA      | 1700                          | 1653.68 $\pm$ 299.29                       | 97.28        | 4.28    | 1663.38 $\pm$ 123.76                       | 97.85        | 5.39    |
|        | PCA     | 85                            | 83.91 $\pm$ 23.68                          | 98.72        | 10.62   | 84.79 $\pm$ 8.57                           | 99.75        | 11.72   |
| Kidney | GA      | 1700                          | 1546.98 $\pm$ 190.34                       | 91.00        | 10.22   | 1469.98 $\pm$ 187.78                       | 86.47        | 8.33    |
|        | PCA     | 85                            | 78.92 $\pm$ 12.14                          | 92.85        | 7.34    | 73.49 $\pm$ 34.57                          | 86.46        | 6.39    |
| Lung   | GA      | 1700                          | 1497.26 $\pm$ 386.36                       | 88.07        | 10.53   | 1507.41 $\pm$ 268.31                       | 88.67        | 6.92    |
|        | PCA     | 85                            | 75.58 $\pm$ 28.33                          | 91.35        | 6.94    | 74.71 $\pm$ 13.26                          | 87.89        | 9.88    |
| Heart  | GA      | 1700                          | 1392.94 $\pm$ 416.13                       | 81.94        | 6.74    | 1532.94 $\pm$ 224.98                       | 90.17        | 7.78    |
|        | PCA     | 85                            | 75.58 $\pm$ 31.28                          | 88.92        | 7.25    | 73.53 $\pm$ 27.13                          | 86.51        | 11.12   |
| Liver  | GA      | 1700                          | 1548.24 $\pm$ 145.03                       | 91.07        | 6.52    | 1419.76 $\pm$ 247.39                       | 83.52        | 8.21    |
|        | PCA     | 85                            | 79.26 $\pm$ 19.87                          | 93.25        | 8.49    | 72.47 $\pm$ 31.82                          | 85.26        | 9.20    |
| Spleen | GA      | 1700                          | 1421.88 $\pm$ 235.76                       | 83.64        | 5.47    | 1470.63 $\pm$ 444.21                       | 86.51        | 9.56    |
|        | PCA     | 85                            | 75.85 $\pm$ 22.67                          | 89.24        | 6.29    | 75.29 $\pm$ 28.13                          | 88.58        | 10.44   |
| Brain  | GA      | 1700                          | 1467.06 $\pm$ 232.63                       | 86.30        | 9.74    | 1489.12 $\pm$ 245.69                       | 87.60        | 8.48    |
|        | PCA     | 85                            | 77.43 $\pm$ 31.17                          | 91.09        | 7.86    | 74.12 $\pm$ 33.05                          | 87.20        | 8.53    |
| Urine  | GA      | 1700                          | 1558.21 $\pm$ 145.16                       | 91.66        | 9.28    | 1484.42 $\pm$ 139.77                       | 87.32        | 12.46   |
|        | PCA     | 85                            | 79.88 $\pm$ 16.88                          | 93.98        | 11.15   | 75.95 $\pm$ 6.43                           | 89.35        | 7.53    |

**Table S3.** Tissue contents of GA and PCA in various rat organs after oral administrations 60 mg/kg of *P. capitatum* extract ( $n = 6$ ).

| Tissue | Analytes | Concentration (ng/g) |         |         |         |        |        | Mean $\pm$ SD        |
|--------|----------|----------------------|---------|---------|---------|--------|--------|----------------------|
|        |          | 1                    | 2       | 3       | 4       | 5      | 6      |                      |
| Kidney | GA       | 1348.09              | 1245.47 | 1930.40 | 1121.44 | 785.68 | 880.65 | 1218.62 $\pm$ 408.71 |
|        | PCA      | 46.93                | 55.27   | 63.18   | 38.88   | 30.39  | 29.22  | 43.98 $\pm$ 13.66    |
| Lung   | GA       | 382.01               | 360.02  | 279.16  | 160.23  | 176.66 | 190.42 | 258.08 $\pm$ 96.93   |
|        | PCA      | 13.59                | 22.23   | 20.18   | 13.80   | 24.51  | 22.57  | 19.48 $\pm$ 4.68     |
| Heart  | GA       | 133.09               | 163.06  | 285.01  | 202.85  | 269.41 | 238.91 | 215.39 $\pm$ 59.98   |
|        | PCA      | ND                   | ND      | ND      | ND      | ND     | ND     | ND                   |
| Liver  | GA       | 186.98               | 199.98  | 235.49  | 269.43  | 287.83 | 209.61 | 231.55 $\pm$ 40.21   |
|        | PCA      | 12.81                | 19.11   | 26.27   | 36.73   | 17.96  | 7.94   | 20.14 $\pm$ 10.21    |
| Spleen | GA       | ND                   | 5.86    | 22.03   | ND      | ND     | 11.54  | 13.14 $\pm$ 8.20     |
|        | PCA      | ND                   | ND      | ND      | ND      | ND     | ND     | ND                   |
| Brain  | GA       | ND                   | ND      | ND      | ND      | ND     | ND     | ND                   |
|        | PCA      | ND                   | ND      | ND      | ND      | ND     | ND     | ND                   |

ND, not detectable.

**Table S4.** Values of tube lens offset (V), collision pressure (m Torr) and collision energy (eV) for the parent ions-product ions transitions.

| Analytes | Transition                    | Tube Lens Offset (V) | Collision Pressure (m Torr) | Collision Energy (eV) |
|----------|-------------------------------|----------------------|-----------------------------|-----------------------|
| GA       | 169.012 $\rightarrow$ 125.042 | 73                   | 1.8                         | 15                    |
| PCA      | 153.114 $\rightarrow$ 109.201 | 77                   | 1.8                         | 15                    |
| IS       | 326.930 $\rightarrow$ 192.017 | 102                  | 1.8                         | 26                    |

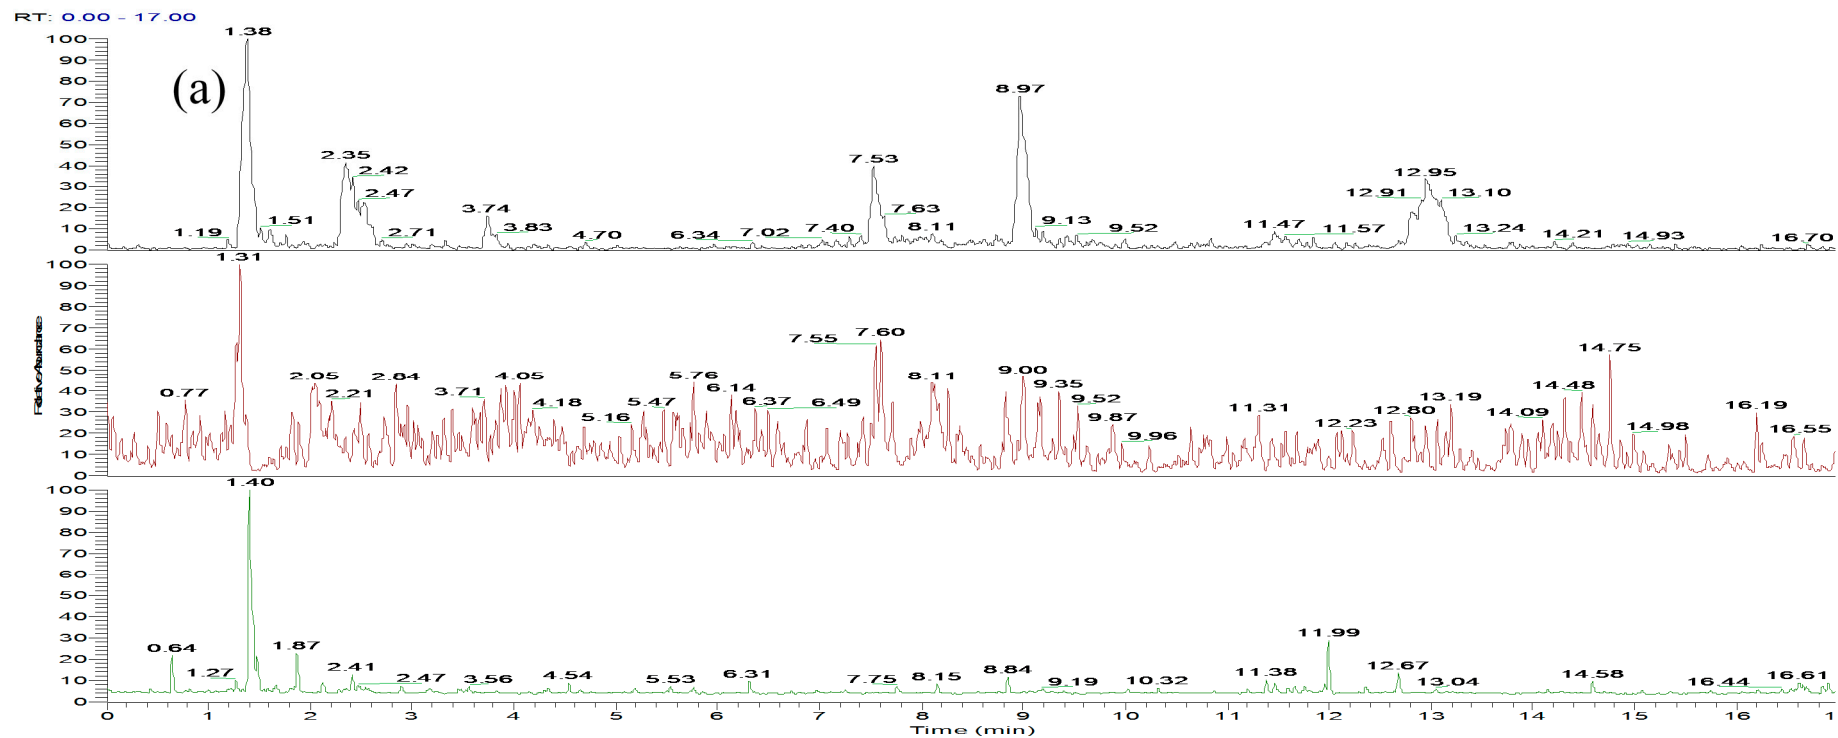

Figure S1. Cont.

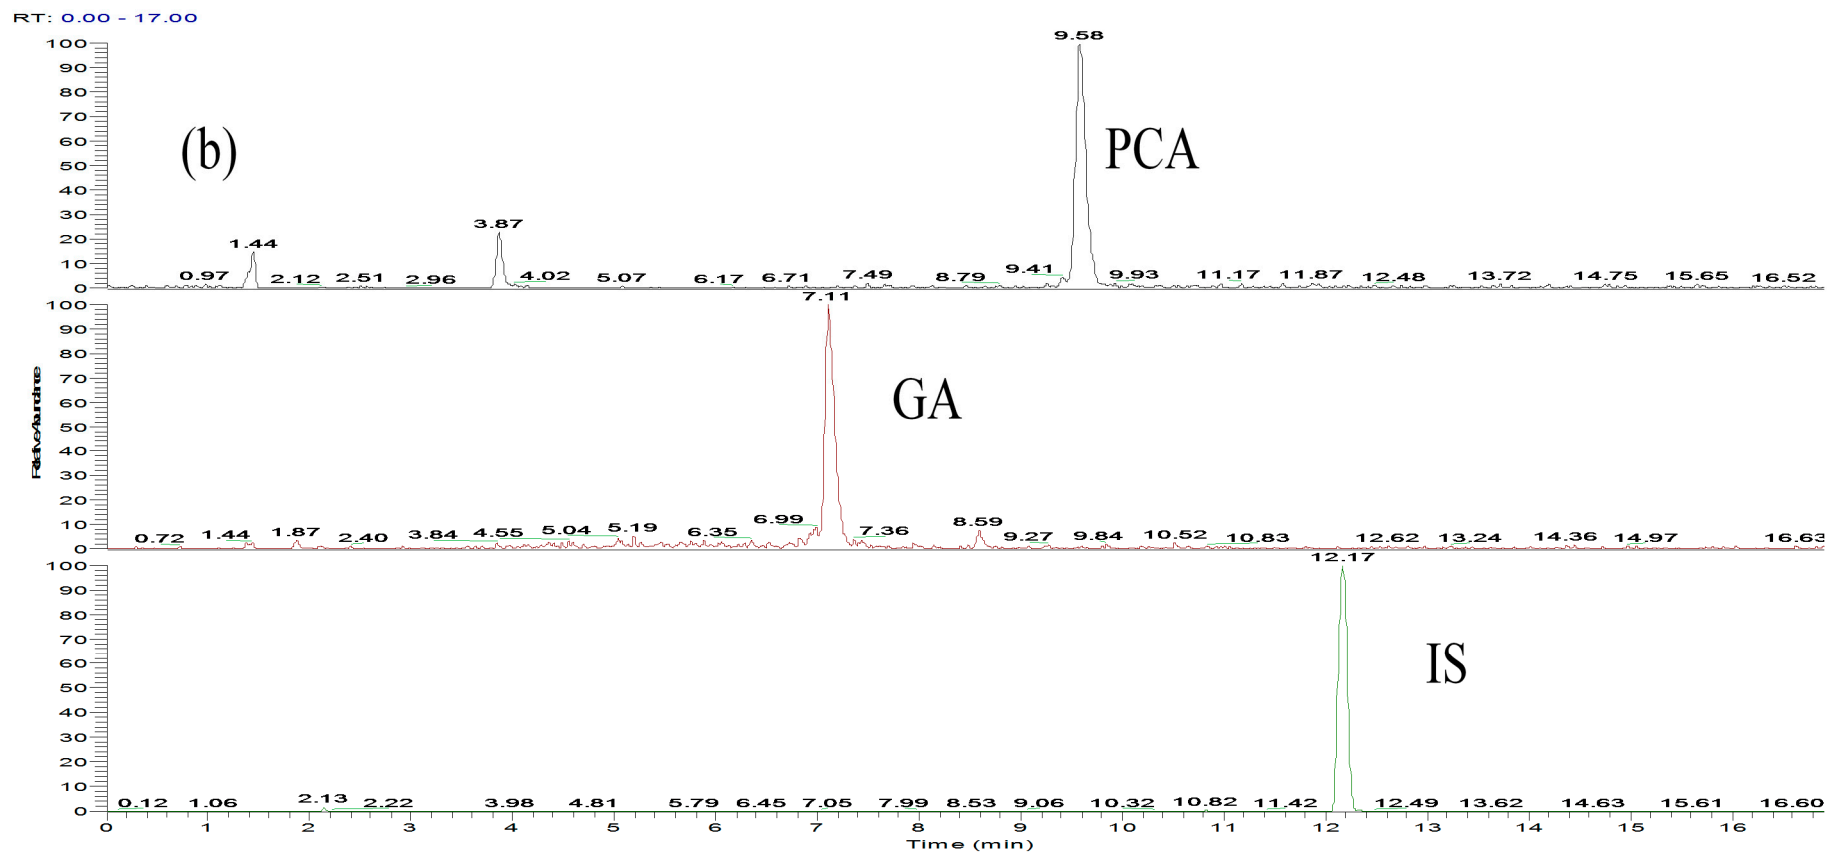

Figure S1. Cont.

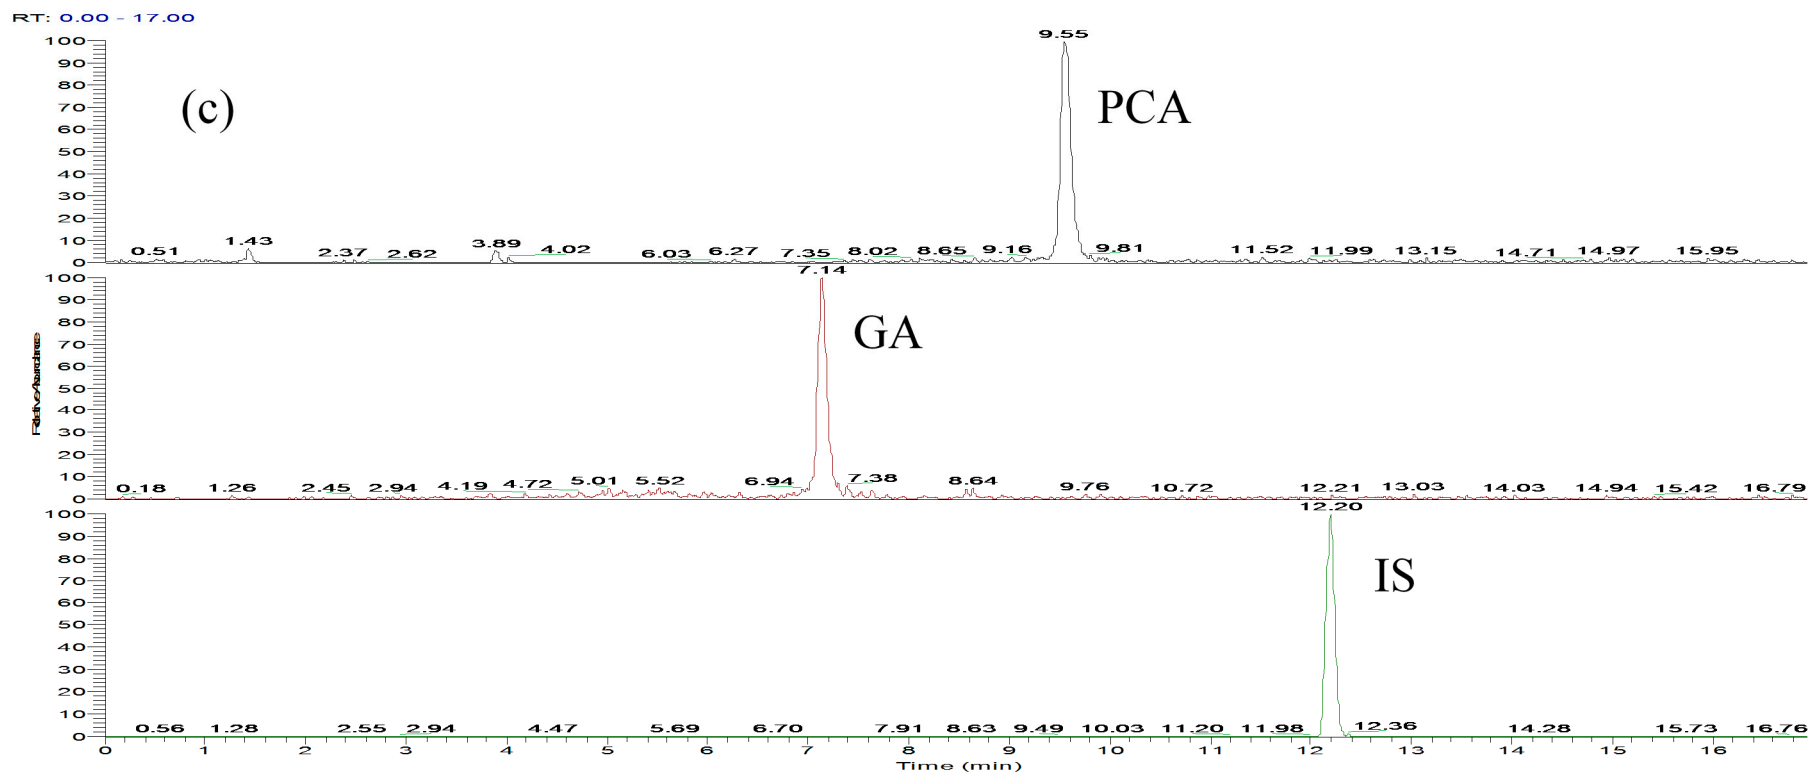

**Figure S1.** Representative MRM chromatograms of GA, PCA and IS (bergenin) in rat urine: (a) blank urine; (b) blank urine spiked with GA, PCA and IS at concentration of 150.02, 49.75, and 10.01 ng/mL, respectively; (c) urine at 0–2 h after oral administration of 60 mg/kg *Polygonum capitatum* extract.

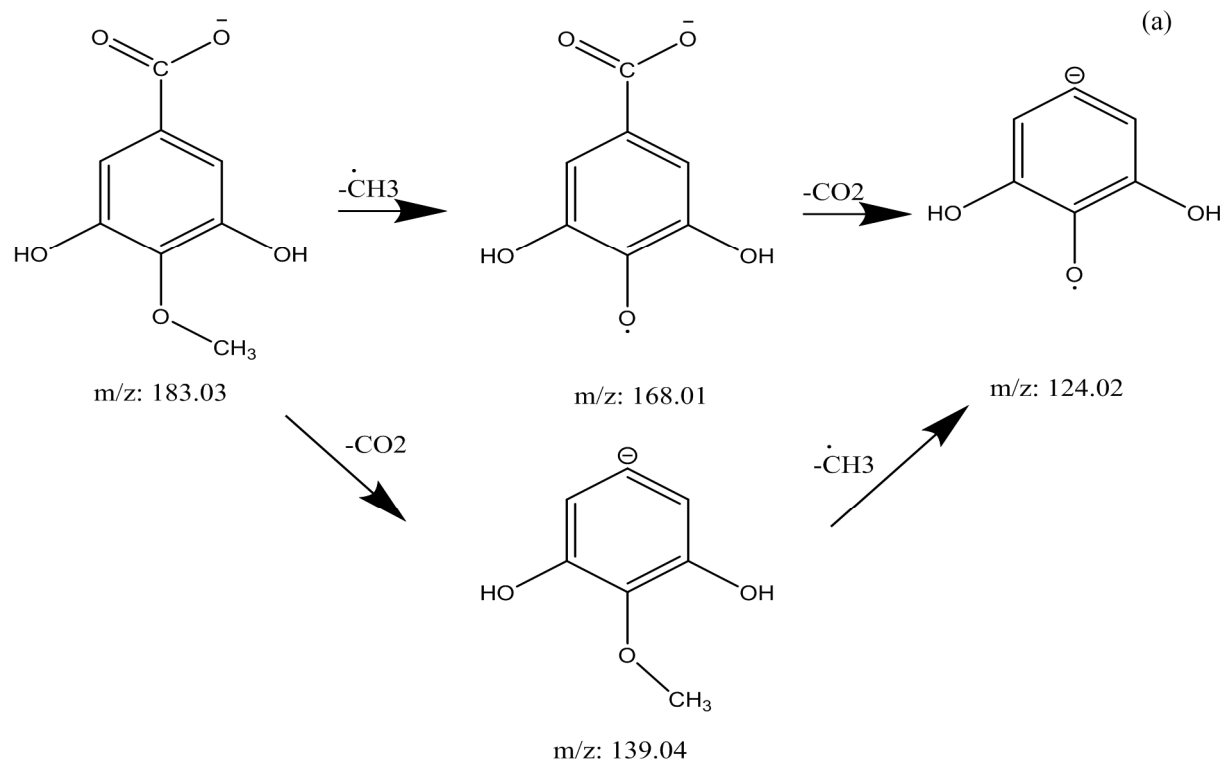

Figure S2. Cont.



2016022306 759 (13.416)

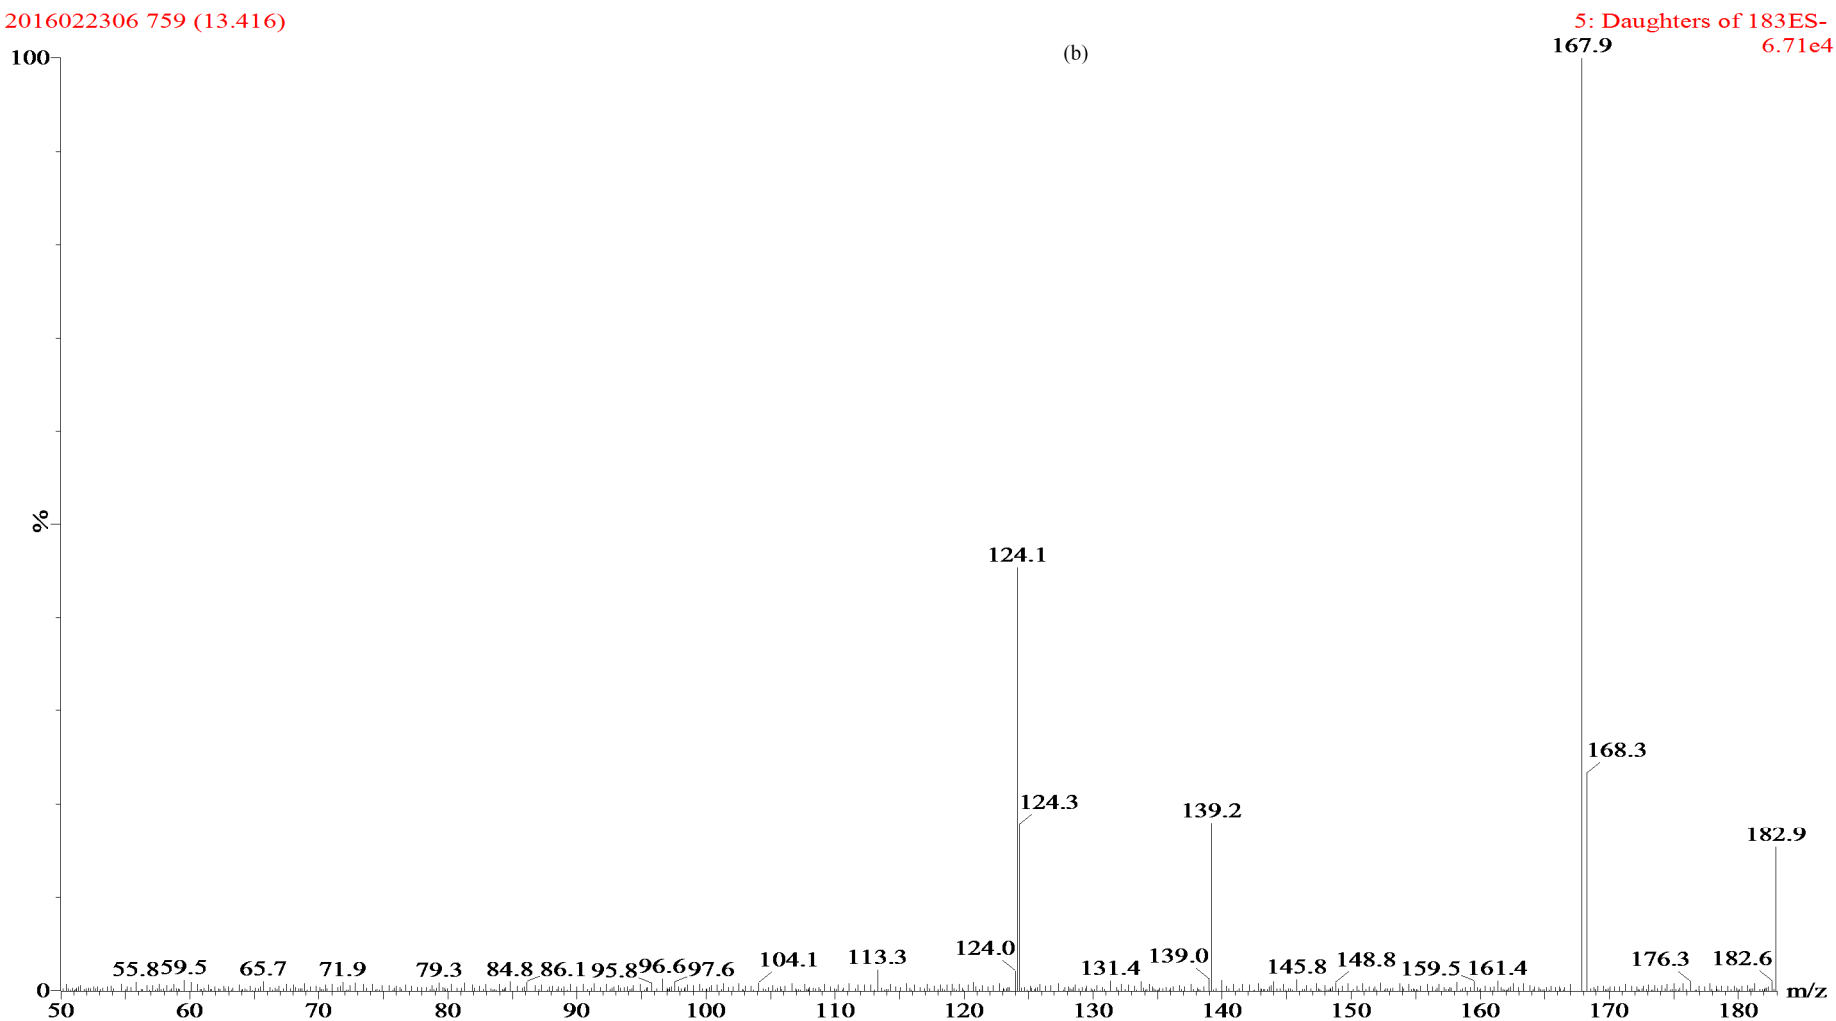

Figure S2. (a) Proposed fragmentation patterns of 4-OMeGA; and (b) its MS/MS spectra under collision energy of 15 eV.
